# Supplementary material
Source: PubMed Central journal article supplement (PMC9827713)
Supplement: NIHMS1857507-supplement-Supplementary_Figure_1.pdf [file NIHMS1857507-supplement-Supplementary_Figure_1.pdf]

**A**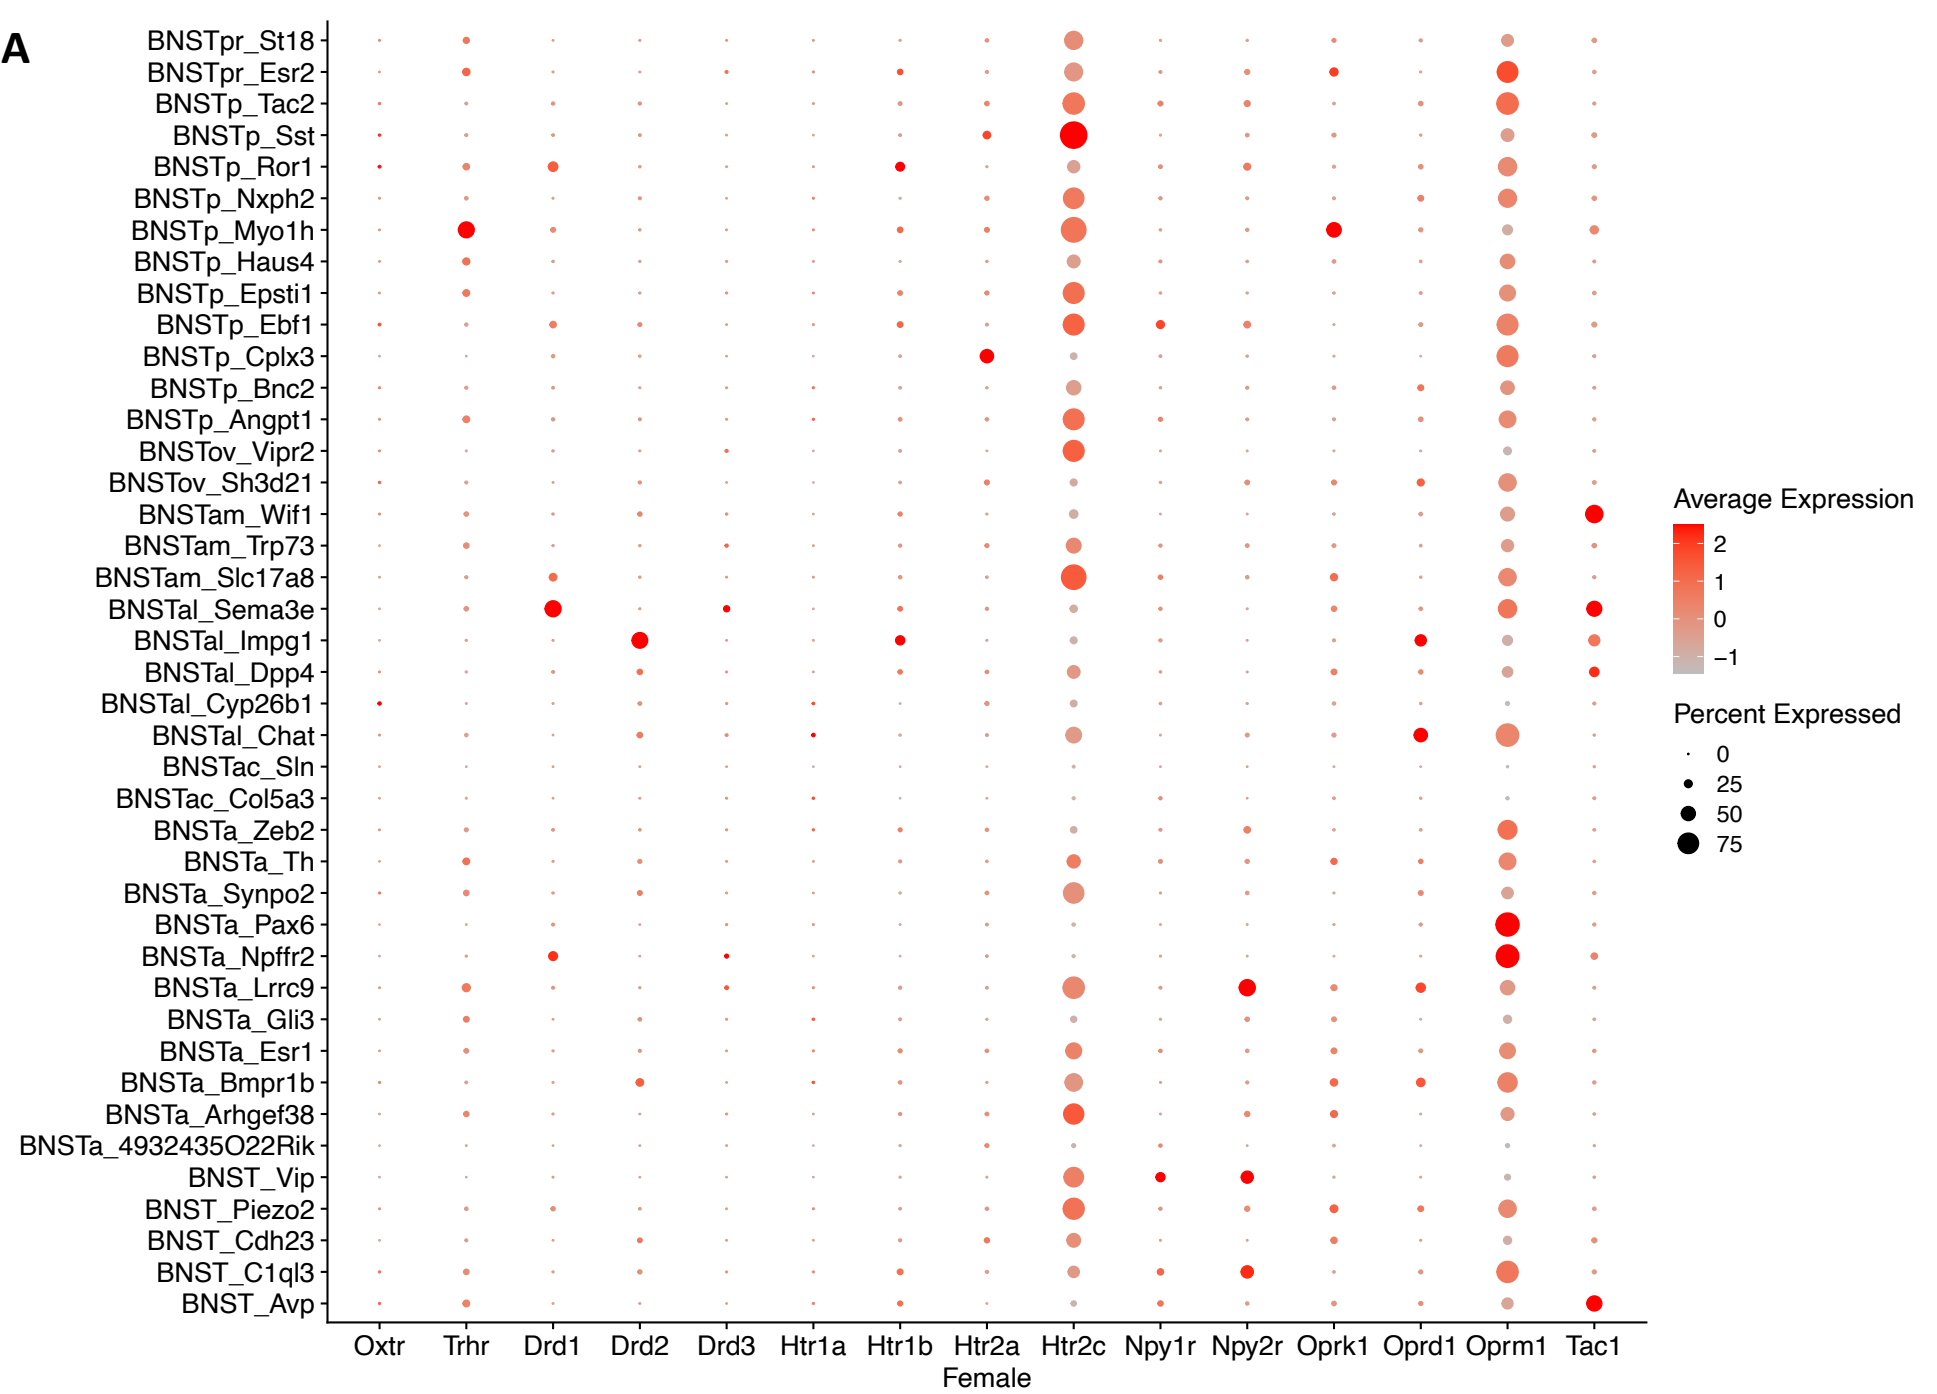**B**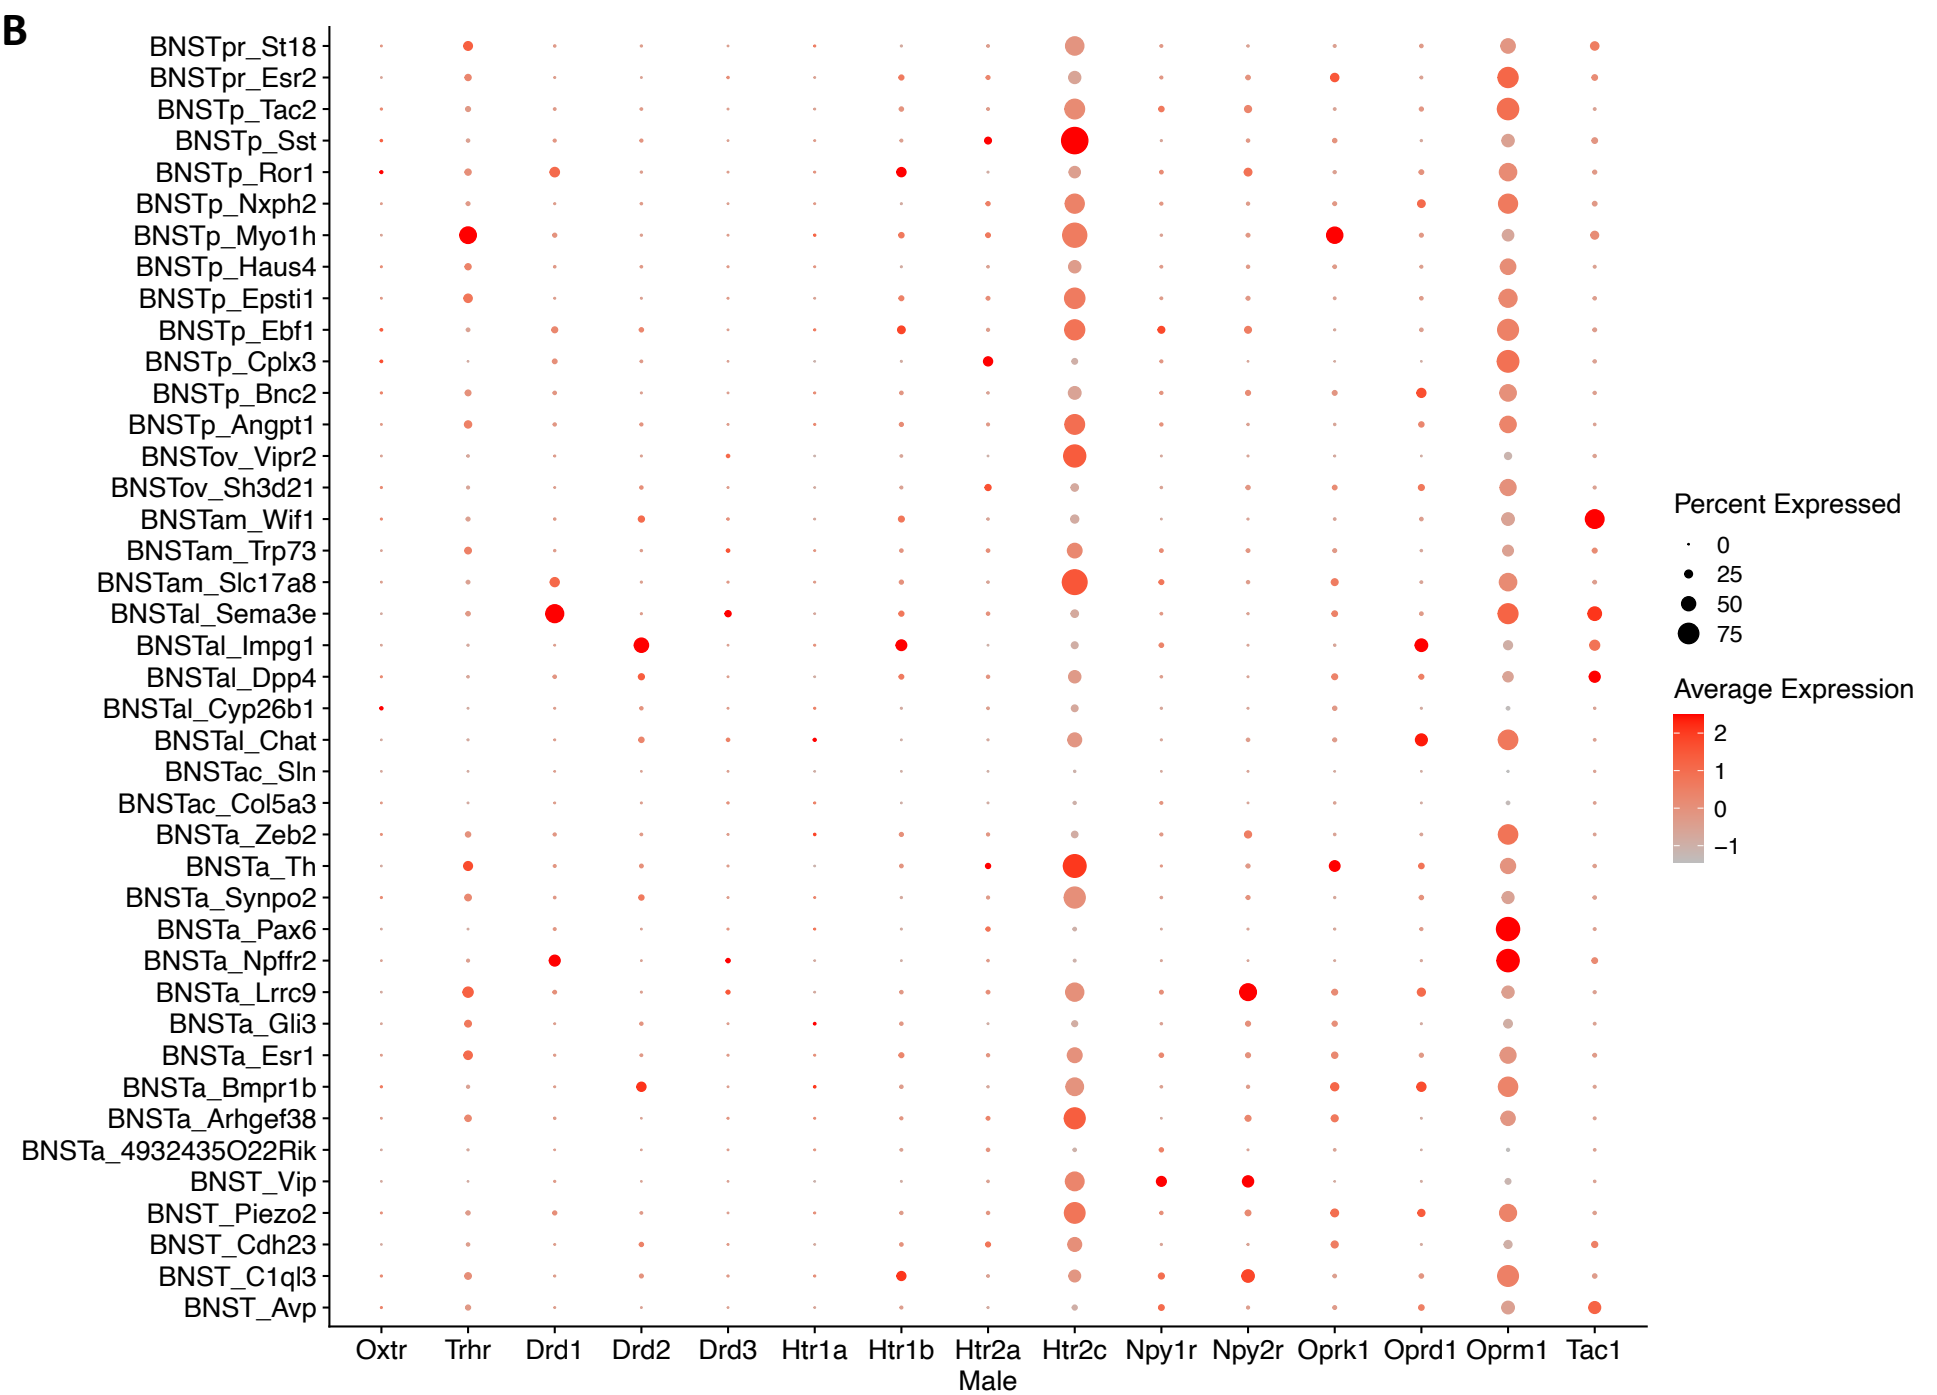

**Supplementary Figure 1. Expression patterns of selected transcripts in the BNST.** *Oxtr* transcript has relatively low expression level across all clusters compared to transcripts for TRH, dopamine, serotonin, NPY and opioid receptor in both female (A) and male (B) *Mus musculus*.
